# Supplementary material for: Proteomic identification and characterization of hepatic glyoxalase 1 dysregulation in non-alcoholic fatty liver disease
Source: PubMed Central journal article supplement (PMC5813374; doi:10.1186/s12953-018-0131-y), 2018-02-14
Supplement: 12953_2018_131_MOESM1_ESM.pdf [file 12953_2018_131_MOESM1_ESM.pdf]

**SUPPLEMENTARY MATERIAL**

Proteomic identification and characterization of hepatic glyoxalase 1 dysregulation in non-alcoholic fatty liver disease

Spanos C, Maldonado EM, Fisher CP, Leenutaphong P, Oviedo-Orta E, Windridge D, Salguero FJ, Bermúdez-Fajardo A, Weeks ME, Evans C, Corfe BM, Rabbani N, Thornalley PJ, Miller MH, Wang H, Dillon JF, Quaglia A, Dhawan A, Fitzpatrick E and Moore JB<sup>1</sup>.

<sup>1</sup>Corresponding Author: J. Bernadette Moore j.b.moore@leeds.ac.uk

Table of Contents

|                                                                                                                                      |    |
|--------------------------------------------------------------------------------------------------------------------------------------|----|
| <b>Fig. S1.</b> Proteomic workflow .....                                                                                             | 2  |
| <b>Fig. S2.</b> iTRAQ-based proteomic analysis of murine liver membrane and cytosolic proteins..                                     | 3  |
| <b>Fig. S3.</b> Clustergram of gene names for differentially expressed proteins significantly overrepresented in KEGG pathways. .... | 4  |
| <b>Fig. S4.</b> Proteomic identification of lactoylglutathione lyase (glyoxalase 1; GLO1).....                                       | 5  |
| <b>Fig. S5.</b> Hepatic fibrosis and heart pathology after 12 or 16 weeks. ....                                                      | 6  |
| <b>Fig. S6.</b> Mass spectrometry confirms immunoprecipitated band as GLO1. ....                                                     | 7  |
| <b>Fig. S7.</b> Serum levels of MG-H1 and sRAGE in adult NAFLD patients. ....                                                        | 8  |
| <b>Table S1.</b> Differentially expressed proteins in liver cytosolic fraction .....                                                 | 9  |
| <b>Table S2.</b> Differentially expressed proteins in liver membrane fraction .....                                                  | 13 |
| <b>Table S3.</b> Correlation of sRAGE with clinical features of NAFLD .....                                                          | 17 |
| <b>Table S4.</b> Histopathological scoring for individual biopsies from 9 pediatric patients with NAFLD .....                        | 18 |

Supplementary Figure 1

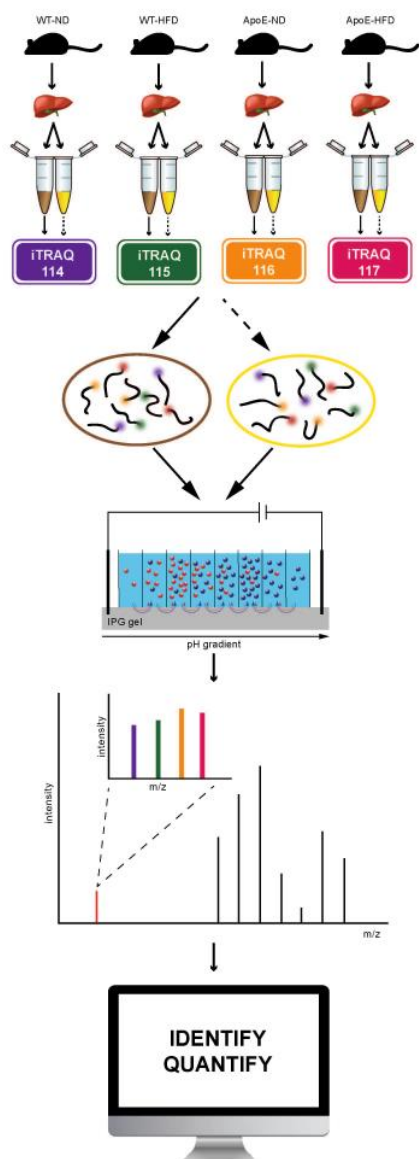

Liver cytosolic and membrane protein extraction from wildtype (WT) and apolipoprotein E knockout (ApoE<sup>-/-</sup>) animals fed either a normal (ND) or high fat (HFD) diet for 12 weeks (n=3/group)

Tryptic digestion and iTRAQ labelling

Cytosolic & membrane iTRAQ labelled peptide pools

Peptide fraction (24 fractions) by OFFGEL (Agilent) isoelectric focusing

nLC-MS/MS using 6520 Q-ToF (Agilent); Peak lists generated by Mass Hunter (Agilent)

Scaffold Q+ (version 4.8.4; Proteome Software)

Fig. S1. Proteomic workflow.

## Supplementary Figure 2

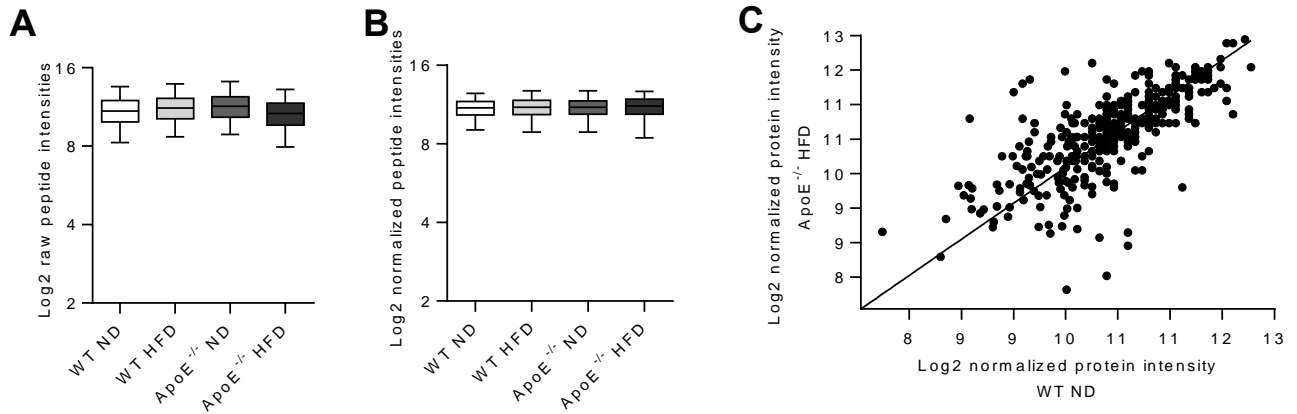

Fig. S2. iTRAQ-based proteomic analysis of murine liver membrane and cytosolic proteins. A Raw and B normalized membrane peptide intensities; data are median of 8522 peptides, whiskers illustrate 5th-95th percentiles; datasets were initially normalized using a peptide mean intensity based normalization. C Scatter plot of 349 normalized membrane protein intensities for WT ND vs. ApoE<sup>-/-</sup> HFD.

## Supplementary Figure 3

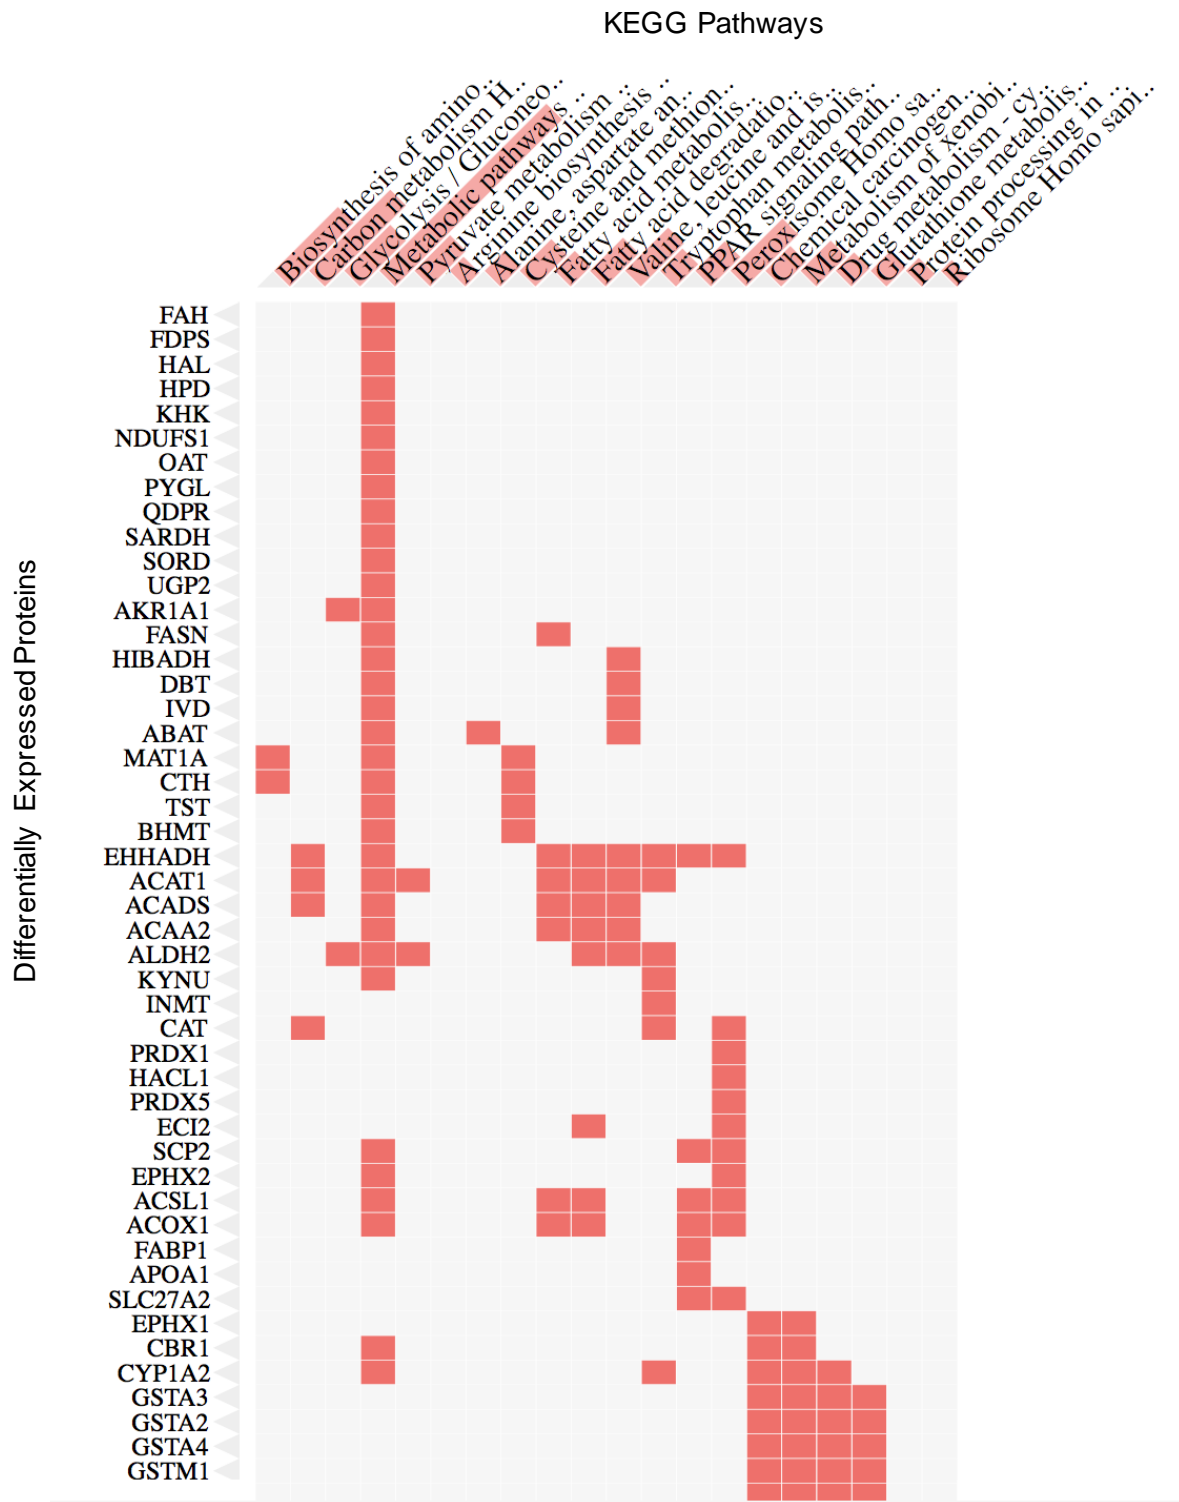

Fig. S3. Clustergram of gene names for differentially expressed proteins significantly overrepresented in KEGG pathways. Data shown for top 20 most significant pathway associations and are clustered according to combined score for both input proteins and pathways. The Enrichr combined score combines a Fisher's exact P-score and a z-score assessing the deviation from the expected rank (Kuleshov, 2016) to evaluate overrepresentation.

## Supplementary Figure 4

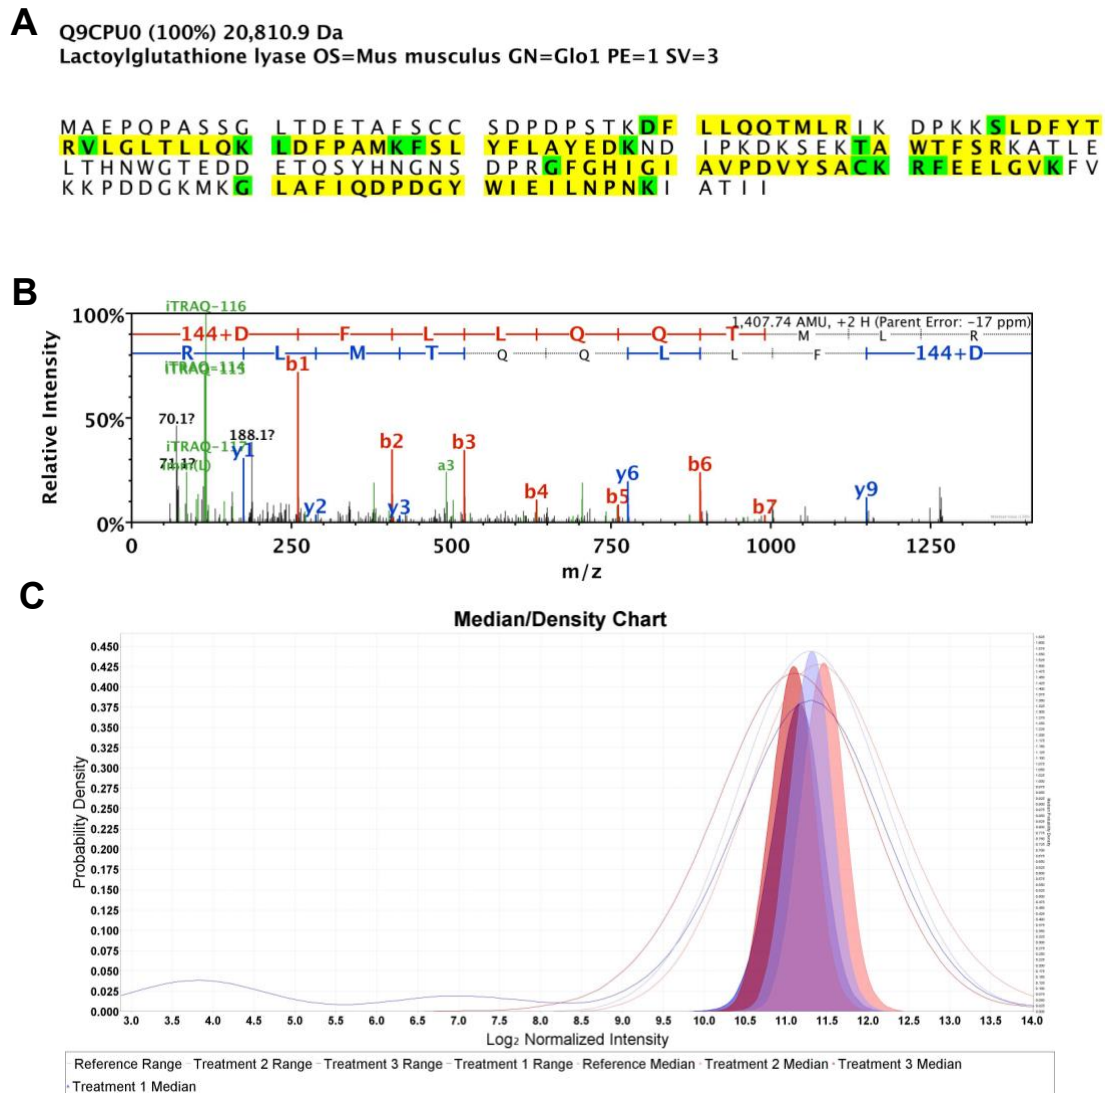

Fig. S4. Proteomic identification of lactoylglutathione lyase (glyoxalase 1; GLO1). **A** MS/MS peptides identified and protein sequence coverage of GLO1. **B** MS/MS spectrum for peptide DFLLQQTMLR. **C** Plot of density distribution estimated using a kernel density function from all spectra. Light blue: WT ND, dark blue: WT HFD, light red: ApoE<sup>-/-</sup> ND, dark red: ApoE<sup>-/-</sup> HFD.

## Supplementary Figure 5

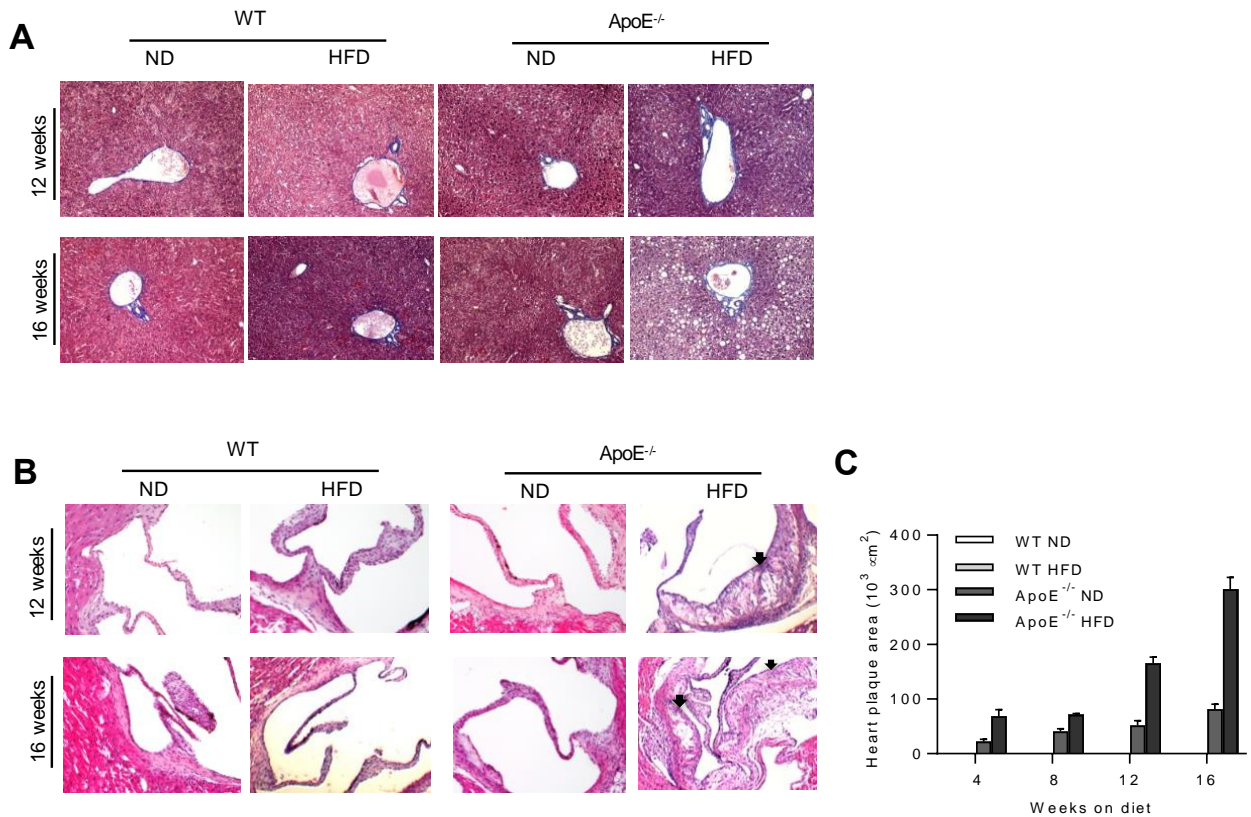

Fig. S5. Hepatic fibrosis and heart pathology after 12 or 16 weeks. **A** Liver sections stained with Masson's trichrome stain from mice. No significant fibrosis is observed after 12 or 16 weeks in any group at any time point. **B** Heart aortic sinus sections taken from mice at 12 or 16 weeks show plaques (arrows) at 12 and 16 weeks. Sections were stained with hematoxylin-eosin; original magnification: 200x. **C** Plaque area in heart sections were quantified using ImageJ software.

Supplementary Figure 6

**A**

Lactoylglutathione lyase OS=Homo sapiens GN=GLO1 PE=1 SV=4

Database: SwissProt  
 Score: 200  
 Nominal mass (M<sub>r</sub>): 20764  
 Calculated pI: 5.12  
 Taxonomy: [Homo sapiens](#)

Sequence similarity is available as an [NCBI BLAST search of LGUL\\_HUMAN](#) against nr.

Search parameters

MS data file: CE\_BM\_Band\_3\_BE3\_01\_1029.mgf  
 Enzyme: Trypsin: cuts C-term side of KR unless next residue is P.  
 Variable modifications: [Acetyl \(K\)](#), [Acetyl \(N-term\)](#), [Carbamidomethyl \(C\)](#), [Oxidation \(M\)](#)

Protein sequence coverage: 28%

Matched peptides shown in **bold red**.

1 MAEPQPPSGG LTDEAALSCC SDADPSTEDF **L**LQQTMLRVK DFKGSLDFIT  
 51 **R**VLGMLTIQK CDFPIMKFSL YFLAIEDND IPKEDKIA WALSRKATLE  
 101 LTHHWGTEDD ETQSYHNGNS DFRGFGHIGI AVPDVYSACK **R**FEEELGVKTV  
 151 KKFDDGKGGK LAFIQDFDGY WIEILNPHHM ATLM

Unformatted sequence string: [184 residues](#) (for pasting into other applications).

Sort peptides by:  Residue Number  Increasing Mass  Decreasing Mass

Show predicted peptides also

| Query                | Start - End | Observed | Mr (expt) | Mr (calc) | Delta M   | Score | Expect  | Rank | U | Peptide                       |
|----------------------|-------------|----------|-----------|-----------|-----------|-------|---------|------|---|-------------------------------|
| <a href="#">#280</a> | 29 - 38     | 632.8800 | 1263.7454 | 1263.6645 | 0.0809 0  | 62    | 0.00038 | 1    | U | K.DFLQQTMLR.V                 |
| <a href="#">#281</a> | 29 - 38     | 632.8970 | 1263.7794 | 1263.6645 | 0.1149 0  | 59    | 0.00081 | 1    | U | K.DFLQQTMLR.V                 |
| <a href="#">#286</a> | 29 - 38     | 640.8350 | 1279.6554 | 1279.6595 | -0.0040 0 | 68    | 8.9e-05 | 1    | U | K.DFLQQTMLR.V + Oxidation (M) |
| <a href="#">#287</a> | 29 - 38     | 640.8630 | 1279.7114 | 1279.6595 | 0.0520 0  | 60    | 0.00063 | 1    | U | K.DFLQQTMLR.V + Oxidation (M) |
| <a href="#">#288</a> | 29 - 38     | 640.8680 | 1279.7214 | 1279.6595 | 0.0620 0  | 75    | 2.1e-05 | 1    | U | K.DFLQQTMLR.V + Oxidation (M) |
| <a href="#">#142</a> | 45 - 51     | 451.2560 | 900.4974  | 900.4341  | 0.0633 0  | 28    | 1.2     | 1    | U | K.SLDFITR.V                   |
| <a href="#">#132</a> | 52 - 60     | 501.8110 | 1001.6074 | 1001.5943 | 0.0131 0  | 41    | 0.06    | 1    | U | K.VLGMFLIQK.C                 |
| <a href="#">#133</a> | 68 - 78     | 698.5460 | 1395.0774 | 1394.6758 | 0.4017 0  | 17    | 14      | 1    | U | K.FSLFLAIEDK.N                |
| <a href="#">#352</a> | 89 - 95     | 408.7360 | 813.4574  | 815.4653  | -0.0079 0 | 41    | 0.073   | 1    | U | K.LWALSR.K                    |
| <a href="#">#285</a> | 141 - 148   | 489.2580 | 976.5014  | 976.5342  | -0.0327 1 | 46    | 0.017   | 1    | U | K.RFEEELGVK.F                 |
| <a href="#">#286</a> | 142 - 148   | 411.2300 | 820.4454  | 820.4331  | 0.0124 0  | 11    | 52      | 7    | U | R.FEEELGVK.F                  |

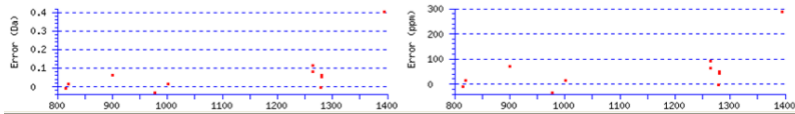

**B**

MS/MS Fragmentation of **DFLLQQTMLR**  
 Found in [LGUL\\_HUMAN](#) in [SwissProt](#), Lactoylglutathione lyase OS=Homo sapiens GN=GLO1 PE=1 SV=4

Match to Query 280: 1263.745448 from(632.880000,2+) intensity(1065786.0000) index(497)  
 Title: Cmpd 498: mSm(632.88), 34.0 min  
 Data file CE\_BM\_Band\_3\_BE3\_01\_1029.mgf

Click mouse within plot area to zoom in by factor of two about that point  
 Or: Plot from: 150 to 1100 Da Full range  
 Label all possible matches  Label matches used for scoring   
 Show Y-axis

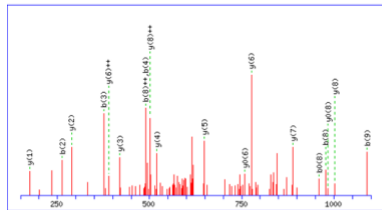

Monoisotopic mass of neutral peptide Mr(calc): 1263.6645  
 Ions Score: 62 Expect: 0.00038  
 Matches: 13/94 fragment ions using 27 most intense peaks [\(help\)](#)

| #  | b                | b <sup>++</sup> | b <sup>+</sup> | b <sup>+++</sup> | b <sup>0</sup>  | b <sup>0++</sup> | Seq.     | y                | y <sup>++</sup> | y <sup>+</sup> | y <sup>+++</sup> | y <sup>0</sup>  | y <sup>0++</sup> | #  |
|----|------------------|-----------------|----------------|------------------|-----------------|------------------|----------|------------------|-----------------|----------------|------------------|-----------------|------------------|----|
| 1  | 116.0342         | 58.5207         |                |                  | 98.0237         | 49.5155          | <b>D</b> |                  |                 |                |                  |                 |                  | 10 |
| 2  | <b>263.1026</b>  | 132.0550        |                |                  | 245.0921        | 123.0497         | <b>F</b> | 1149.6449        | 575.3261        | 1132.6183      | 566.8128         | 1131.6343       | 566.3208         | 9  |
| 3  | <b>376.1807</b>  | 188.5970        |                |                  | 358.1761        | 179.5917         | <b>L</b> | <b>1002.5765</b> | 501.7919        | 985.5499       | 493.2786         | <b>984.5659</b> | 492.7866         | 8  |
| 4  | <b>489.2708</b>  | 245.1390        |                |                  | 471.2602        | 236.1337         | <b>L</b> | <b>889.4924</b>  | 445.2498        | 872.4659       | 436.7366         | 871.4818        | 436.2446         | 7  |
| 5  | 617.3293         | 309.1683        | 600.3028       | 300.6550         | 599.3188        | 300.1630         | <b>Q</b> | <b>776.4083</b>  | 388.7078        | 759.3818       | 380.1945         | <b>758.3978</b> | 379.7025         | 6  |
| 6  | 745.3879         | 373.1976        | 728.3614       | 364.6843         | 727.3774        | 364.1923         | <b>Q</b> | <b>648.3498</b>  | 324.6785        | 631.3232       | 316.1652         | 630.3392        | 315.6732         | 5  |
| 7  | 846.4356         | 423.7214        | 829.4090       | 415.2082         | 828.4250        | 414.7162         | <b>T</b> | <b>520.2912</b>  | 260.6492        | 503.2640       | 252.1360         | 502.2806        | 251.6439         | 4  |
| 8  | <b>977.4761</b>  | <b>489.2417</b> | 960.4495       | 480.7284         | <b>959.4655</b> | 480.2364         | <b>M</b> | <b>419.2435</b>  | 210.1254        | 402.2170       | 201.6121         |                 |                  | 3  |
| 9  | <b>1090.5601</b> | 545.7837        | 1073.5336      | 537.2704         | 1072.5496       | 536.7784         | <b>L</b> | <b>288.2630</b>  | 144.6051        | 271.1765       | 136.0919         |                 |                  | 2  |
| 10 |                  |                 |                |                  |                 |                  | <b>R</b> | <b>175.1190</b>  | 88.0631         | 158.0924       | 79.5498          |                 |                  | 1  |

Fig. S6. Mass spectrometry confirms immunoprecipitated band as GLO1. **A** MASCOT identification of GLO1 with 28% sequence coverage and 6 peptide sequences. **B** MS/MS spectrum for peptide DFLLQQTMLR.

## Supplementary Figure 7

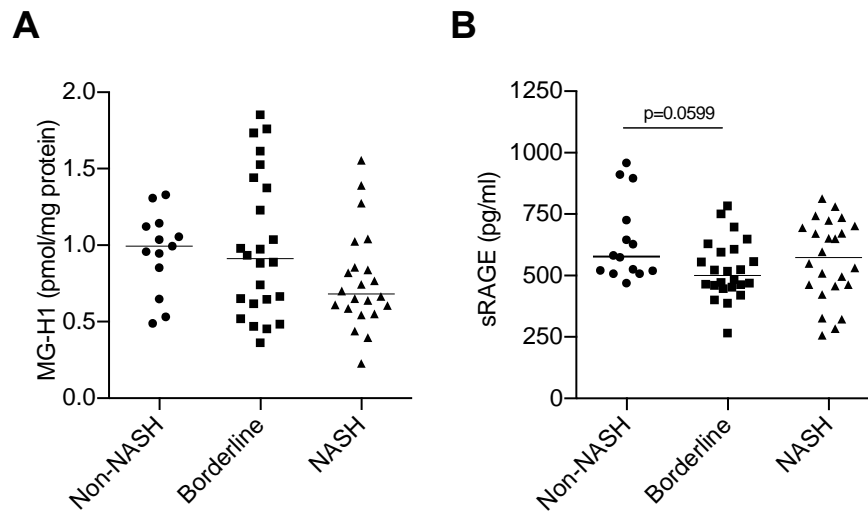

Fig. S7. Serum levels of MG-H1 and sRAGE in adult NAFLD patients. **A** Serum levels of the major methylglyoxal-derived advanced glycation endproduct, hydroimidazolone MG-H1, in (n=59) adult NAFLD patients with median illustrated. **B** Serum levels of the soluble receptor for advanced glycation endproducts (sRAGE). Measured in (n=62) adult NAFLD patients with median illustrated.



## Supplementary Table 1

**Table S1.** Differentially expressed proteins in liver cytosolic fraction

| Accession     | Protein Name                                 | MW             | Wt-ND        | Wt-HFD       | ApoE-ND      | ApoE-HFD     | Kruskal-Wallis     | Permutation        |
|---------------|----------------------------------------------|----------------|--------------|--------------|--------------|--------------|--------------------|--------------------|
| P06801        | NADP-dependent malic enzyme                  | 64 kDa         | -1.09        | -1.00        | -0.11        | -2.72        | < 0.0001           | 0.00023            |
| Q64471        | Glutathione S-transferase theta-1            | 27 kDa         | 0.00         | -1.91        | 0.07         | -2.15        | 0.009              | 0.00089            |
| <b>P30115</b> | <b>Glutathione S-transferase A3</b>          | <b>25 kDa</b>  | <b>0.00</b>  | <b>-1.29</b> | <b>0.46</b>  | <b>-1.49</b> | <b>&lt; 0.0001</b> | <b>&lt; 0.0001</b> |
| Q8VCN5        | Cystathionine gamma-lyase                    | 44 kDa         | -0.05        | -1.42        | -0.23        | -1.47        | 0.0012             | 0.00016            |
| Q9DBE0        | Cysteine sulfinic acid decarboxylase         | 55 kDa         | 0.04         | -1.19        | 0.38         | -1.31        | < 0.0001           | < 0.0001           |
| Q8BVI4        | Dihydropteridine reductase                   | 26 kDa         | 0.10         | -0.74        | -0.97        | -1.24        | 0.0044             | 0.005              |
| P10648        | Glutathione S-transferase A2                 | 26 kDa         | 0.09         | -1.15        | 0.21         | -1.23        | < 0.0001           | < 0.0001           |
| <b>P19096</b> | <b>Fatty acid synthase</b>                   | <b>272 kDa</b> | <b>-0.13</b> | <b>-0.02</b> | <b>-0.68</b> | <b>-1.15</b> | <b>&lt; 0.0001</b> | <b>&lt; 0.0001</b> |
| <b>P10649</b> | <b>Glutathione S-transferase Mu 1</b>        | <b>26 kDa</b>  | <b>-0.02</b> | <b>-0.95</b> | <b>0.04</b>  | <b>-1.11</b> | <b>&lt; 0.0001</b> | <b>&lt; 0.0001</b> |
| P13707        | Glycerol-3-phosphate dehydrogenase [NAD+],   | 38 kDa         | -0.06        | 0.09         | 0.27         | -1.01        | < 0.0001           | < 0.0001           |
| P40936        | Indolethylamine N-methyltransferase          | 29 kDa         | 0.00         | 0.30         | 0.37         | -0.98        | 0.0024             | < 0.0001           |
| P24472        | Glutathione S-transferase A4                 | 26 kDa         | 0.00         | -0.38        | 0.00         | -0.98        | < 0.0001           | < 0.0001           |
| P53657        | Pyruvate kinase isozymes R/L                 | 62 kDa         | 0.05         | 0.31         | -0.58        | -0.94        | 0.013              | 0.002              |
| <b>P12710</b> | <b>Fatty acid-binding protein, liver</b>     | <b>14 kDa</b>  | <b>-0.01</b> | <b>-0.44</b> | <b>-0.01</b> | <b>-0.90</b> | <b>&lt; 0.0001</b> | <b>&lt; 0.0001</b> |
| <b>P00329</b> | <b>Alcohol dehydrogenase 1</b>               | <b>40 kDa</b>  | <b>-0.02</b> | <b>-0.18</b> | <b>0.27</b>  | <b>-0.90</b> | <b>&lt; 0.0001</b> | <b>&lt; 0.0001</b> |
| <b>P16015</b> | <b>Carbonic anhydrase 3</b>                  | <b>29 kDa</b>  | <b>-0.02</b> | <b>0.39</b>  | <b>0.31</b>  | <b>-0.87</b> | <b>&lt; 0.0001</b> | <b>&lt; 0.0001</b> |
| <b>P35505</b> | <b>Fumarylacetoacetase</b>                   | <b>46 kDa</b>  | <b>0.05</b>  | <b>-0.94</b> | <b>-0.28</b> | <b>-0.87</b> | <b>0.00023</b>     | <b>0.0028</b>      |
| P24549        | Retinal dehydrogenase 1                      | 54 kDa         | 0.00         | -0.23        | 0.51         | -0.82        | < 0.0001           | < 0.0001           |
| Q920E5        | Farnesyl pyrophosphate synthase              | 41 kDa         | -0.06        | -1.38        | 0.01         | -0.71        | 0.0011             | < 0.0001           |
| <b>Q64442</b> | <b>Sorbitol dehydrogenase</b>                | <b>38 kDa</b>  | <b>-0.02</b> | <b>-0.08</b> | <b>0.11</b>  | <b>-0.71</b> | <b>&lt; 0.0001</b> | <b>&lt; 0.0001</b> |
| P34884        | Macrophage migration inhibitory factor       | 12 kDa         | 0.03         | -0.64        | 0.19         | -0.68        | 0.013              | 0.015              |
| O35945        | Aldehyde dehydrogenase, cytosolic 1          | 55 kDa         | 0.01         | -0.23        | 0.45         | -0.66        | 0.018              | 0.0022             |
| Q91ZJ5        | UTP--glucose-1-phosphate uridylyltransferase | 57 kDa         | 0.04         | -0.51        | -0.12        | -0.66        | 0.02               | 0.015              |
| P35700        | Peroxiredoxin-1                              | 22 kDa         | 0.00         | -0.97        | -0.30        | -0.64        | 0.00016            | 0.00048            |
| <b>P17182</b> | <b>Alpha-enolase</b>                         | <b>47 kDa</b>  | <b>-0.02</b> | <b>-0.13</b> | <b>0.04</b>  | <b>-0.59</b> | <b>&lt; 0.0001</b> | <b>&lt; 0.0001</b> |

Spanos *et al.* Supplementary Material

|               |                                                    |               |              |              |              |              |                    |                    |
|---------------|----------------------------------------------------|---------------|--------------|--------------|--------------|--------------|--------------------|--------------------|
| Q8BH00        | Aldehyde dehydrogenase family 8 member A1          | 54 kDa        | 0.05         | -0.06        | -0.11        | -0.57        | 0.0014             | < 0.0001           |
| <b>Q91Y97</b> | <b>Fructose-bisphosphate aldolase B</b>            | <b>39 kDa</b> | <b>-0.03</b> | <b>-0.15</b> | <b>0.11</b>  | <b>-0.57</b> | <b>&lt; 0.0001</b> | <b>&lt; 0.0001</b> |
| <b>P52760</b> | <b>Ribonuclease UK114</b>                          | <b>14 kDa</b> | <b>0.02</b>  | <b>-0.25</b> | <b>0.12</b>  | <b>-0.53</b> | <b>&lt; 0.0001</b> | <b>0.005</b>       |
| P50247        | Adenosylhomocysteinase                             | 48 kDa        | -0.01        | 0.06         | 0.03         | -0.43        | < 0.0001           | 0.00039            |
| <b>P16858</b> | <b>Glyceraldehyde-3-phosphate dehydrogenase</b>    | <b>36 kDa</b> | <b>-0.01</b> | <b>0.04</b>  | <b>-0.14</b> | <b>-0.41</b> | <b>0.00016</b>     | <b>0.018</b>       |
| <b>Q9ET01</b> | <b>Glycogen phosphorylase, liver form.</b>         | <b>97 kDa</b> | <b>-0.02</b> | <b>0.09</b>  | <b>-0.37</b> | <b>-0.40</b> | <b>0.00024</b>     | <b>0.0058</b>      |
| P35492        | Histidine ammonia-lyase                            | 72 kDa        | 0.04         | -0.91        | -0.52        | -0.36        | < 0.0001           | 0.00038            |
| O88844        | Isocitrate dehydrogenase [NADP] cytoplasmic        | 47 kDa        | -0.02        | -0.22        | 0.03         | -0.26        | 0.0018             | 0.0016             |
| <b>P24270</b> | <b>Catalase.</b>                                   | <b>60 kDa</b> | <b>-0.12</b> | <b>-1.01</b> | <b>0.02</b>  | <b>-0.25</b> | <b>0.0047</b>      | <b>0.00088</b>     |
| Q9CPU0        | Lactoylglutathione lyase                           | 21 kDa        | 0.00         | -0.22        | 0.17         | -0.25        | 0.013              | 0.014              |
| Q9QXF8        | Glycine N-methyltransferase.                       | 33 kDa        | -0.02        | -0.47        | 0.01         | -0.19        | 0.00083            | 0.00034            |
| P62984        | Ubiquitin-60S ribosomal protein L40                | 15 kDa        | 0.00         | -0.43        | 0.20         | -0.18        | 0.02               | 0.012              |
| P62983        | Ubiquitin-40S ribosomal protein S27a               | 18 kDa        | 0.00         | -0.43        | 0.20         | -0.18        | 0.02               | 0.012              |
| <b>Q63836</b> | <b>Selenium-binding protein 2</b>                  | <b>53 kDa</b> | <b>-0.03</b> | <b>0.21</b>  | <b>0.43</b>  | <b>-0.17</b> | <b>&lt; 0.0001</b> | <b>&lt; 0.0001</b> |
| <b>Q00623</b> | <b>Apolipoprotein A-I</b>                          | <b>31 kDa</b> | <b>-0.01</b> | <b>0.37</b>  | <b>-0.75</b> | <b>-0.12</b> | <b>&lt; 0.0001</b> | <b>&lt; 0.0001</b> |
| <b>P11588</b> | <b>Major urinary protein 1</b>                     | <b>21 kDa</b> | <b>-0.01</b> | <b>0.32</b>  | <b>1.03</b>  | <b>-0.09</b> | <b>&lt; 0.0001</b> | <b>&lt; 0.0001</b> |
| Q9JII6        | Alcohol dehydrogenase [NADP+]                      | 37 kDa        | -0.01        | -0.11        | 0.28         | -0.06        | 0.0033             | 0.011              |
| P09411        | Phosphoglycerate kinase 1.                         | 45 kDa        | 0.01         | -0.29        | -0.20        | -0.01        | 0.0088             | 0.018              |
| P17742        | Peptidyl-prolyl cis-trans isomerase A              | 18 kDa        | 0.01         | -0.59        | 0.04         | -0.01        | 0.00071            | 0.001              |
| P48758        | Carbonyl reductase [NADPH] 1                       | 31 kDa        | 0.02         | -0.64        | -0.39        | 0.02         | 0.0017             | 0.00073            |
| Q8C196        | Carbamoyl-phosphate synthase [ammonia],            | 165 kDa       | -0.01        | 0.16         | -0.43        | 0.04         | < 0.0001           | < 0.0001           |
| Q923D2        | Flavin reductase (NADPH)                           | 22 kDa        | 0.01         | -0.27        | 0.45         | 0.16         | < 0.0001           | 0.001              |
| P17751        | Triosephosphate isomerase                          | 32 kDa        | -0.01        | -0.26        | -0.14        | 0.17         | < 0.0001           | 0.00067            |
| Q8VC30        | Bifunctional ATP-dependent dihydroxyacetone        | 60 kDa        | -0.03        | 0.78         | 0.05         | 0.19         | < 0.0001           | < 0.0001           |
| P38647        | Stress-70 protein, mitochondrial                   | 74 kDa        | 0.04         | -0.18        | -0.38        | 0.27         | 0.00025            | 0.00015            |
| P10639        | Thioredoxin                                        | 12 kDa        | -0.11        | 0.01         | 0.44         | 0.27         | 0.0039             | 0.004              |
| P99029        | Peroxiredoxin-5, mitochondrial                     | 22 kDa        | -0.02        | -0.16        | 0.01         | 0.29         | 0.0023             | 0.0022             |
| Q9CXF0        | Kynureninase                                       | 52 kDa        | -0.01        | 0.25         | -0.66        | 0.34         | 0.0024             | < 0.0001           |
| P61922        | 4-aminobutyrate aminotransferase,<br>mitochondrial | 56 kDa        | 0.02         | -0.10        | -0.35        | 0.38         | 0.001              | 0.0001             |
| P63038        | 60 kDa heat shock protein, mitochondrial           | 61 kDa        | -0.03        | -0.01        | -0.18        | 0.40         | < 0.0001           | < 0.0001           |

Spanos *et al.* Supplementary Material

|               |                                                       |                |              |              |              |             |                    |                    |
|---------------|-------------------------------------------------------|----------------|--------------|--------------|--------------|-------------|--------------------|--------------------|
| <b>Q07417</b> | <b>Short-chain specific acyl-CoA dehydrogenase,</b>   | <b>45 kDa</b>  | <b>0.00</b>  | <b>-0.44</b> | <b>-0.26</b> | <b>0.40</b> | <b>&lt; 0.0001</b> | <b>&lt; 0.0001</b> |
| Q9DCW4        | Electron transfer flavoprotein subunit beta           | 28 kDa         | -0.01        | -0.20        | -0.26        | 0.40        | < 0.0001           | < 0.0001           |
| <b>Q99LB7</b> | <b>Sarcosine dehydrogenase, mitochondrial</b>         | <b>102 kDa</b> | <b>0.02</b>  | <b>0.17</b>  | <b>-0.36</b> | <b>0.42</b> | <b>&lt; 0.0001</b> | <b>&lt; 0.0001</b> |
| Q9D819        | Inorganic pyrophosphatase                             | 33 kDa         | -0.01        | -0.01        | -0.07        | 0.42        | 0.0068             | 0.0042             |
| P97328        | Ketohexokinase                                        | 33 kDa         | -0.02        | 0.69         | 0.44         | 0.44        | 0.01               | 0.0013             |
| P48036        | Annexin A5                                            | 36 kDa         | 0.01         | -0.22        | -0.17        | 0.47        | < 0.0001           | 0.002              |
| P10126        | Elongation factor 1-alpha 1                           | 50 kDa         | -0.05        | 0.24         | 0.15         | 0.51        | 0.0044             | 0.019              |
| Q8QZT1        | Acetyl-CoA acetyltransferase, mitochondrial           | 45 kDa         | 0.00         | -0.04        | -0.27        | 0.52        | < 0.0001           | 0.001              |
| P53395        | Lipoamide acyltransferase component of branched-chain | 53 kDa         | 0.01         | 0.51         | -0.86        | 0.54        | 0.018              | 0.00091            |
| Q9JHI5        | Isovaleryl-CoA dehydrogenase, mitochondrial           | 46 kDa         | -0.03        | -0.22        | -0.08        | 0.56        | 0.0018             | 0.00016            |
| <b>P08249</b> | <b>Malate dehydrogenase, mitochondrial</b>            | <b>36 kDa</b>  | <b>0.01</b>  | <b>-0.06</b> | <b>-0.17</b> | <b>0.58</b> | <b>&lt; 0.0001</b> | <b>&lt; 0.0001</b> |
| Q9D0S9        | Histidine triad nucleotide-binding protein 2,         | 17 kDa         | -0.03        | 0.37         | -0.07        | 0.58        | 0.0093             | 0.016              |
| Q99LC5        | Electron transfer flavoprotein subunit alpha,         | 35 kDa         | 0.02         | -0.11        | -0.02        | 0.61        | < 0.0001           | 0.019              |
| P40124        | Adenylyl cyclase-associated protein 1                 | 52 kDa         | -0.03        | 0.10         | -0.50        | 0.68        | 0.014              | 0.0032             |
| P05201        | Aspartate aminotransferase, cytoplasmic               | 46 kDa         | 0.01         | -0.52        | -0.17        | 0.69        | < 0.0001           | < 0.0001           |
| Q05920        | Pyruvate carboxylase, mitochondrial                   | 130 kDa        | -0.02        | 0.32         | 0.04         | 0.69        | < 0.0001           | < 0.0001           |
| P47738        | Aldehyde dehydrogenase, mitochondrial                 | 57 kDa         | -0.01        | 0.12         | 0.08         | 0.70        | < 0.0001           | < 0.0001           |
| P63028        | Translationally-controlled tumor protein              | 19 kDa         | -0.04        | 0.55         | -1.22        | 0.76        | 0.0074             | 0.014              |
| Q91X83        | S-adenosylmethionine synthase isoform type-1          | 43 kDa         | 0.00         | 0.28         | -0.17        | 0.77        | < 0.0001           | < 0.0001           |
| <b>P60710</b> | <b>Actin, cytoplasmic 1</b>                           | <b>42 kDa</b>  | <b>-0.02</b> | <b>0.09</b>  | <b>0.26</b>  | <b>0.77</b> | <b>&lt; 0.0001</b> | <b>0.0009</b>      |
| O08997        | Copper transport protein ATOX1                        | 7 kDa          | 0.01         | 0.46         | 0.09         | 0.84        | 0.0032             | 0.00032            |
| <b>P09103</b> | <b>Protein disulfide-isomerase</b>                    | <b>57 kDa</b>  | <b>-0.03</b> | <b>0.27</b>  | <b>0.14</b>  | <b>0.85</b> | <b>&lt; 0.0001</b> | <b>0.00083</b>     |
| <b>Q8BWT1</b> | <b>3-ketoacyl-CoA thiolase, mitochondrial</b>         | <b>42 kDa</b>  | <b>-0.01</b> | <b>0.08</b>  | <b>-0.07</b> | <b>0.85</b> | <b>&lt; 0.0001</b> | <b>&lt; 0.0001</b> |
| O35423        | Serine--pyruvate aminotransferase, mitochondrial      | 46 kDa         | 0.03         | -1.39        | -0.91        | 0.90        | 0.016              | 0.00023            |
| P22599        | Alpha-1-antitrypsin 1-2                               | 46 kDa         | 0.02         | 0.03         | 0.63         | 0.93        | 0.0042             | 0.002              |
| Q9Z2V4        | Phosphoenolpyruvate carboxykinase, cytosolic [GTP]    | 69 kDa         | 0.02         | 0.02         | -0.04        | 1.00        | 0.00033            | < 0.0001           |
| <b>P14211</b> | <b>Calreticulin</b>                                   | <b>48 kDa</b>  | <b>-0.35</b> | <b>-0.20</b> | <b>0.43</b>  | <b>1.05</b> | <b>0.00089</b>     | <b>0.00043</b>     |
| P00920        | Carbonic anhydrase 2                                  | 29 kDa         | -0.04        | 0.27         | 0.97         | 1.11        | < 0.0001           | 0.0014             |

Spanos *et al.* Supplementary Material

|               |                                                  |               |              |              |              |             |                    |                    |
|---------------|--------------------------------------------------|---------------|--------------|--------------|--------------|-------------|--------------------|--------------------|
| <b>P20029</b> | <b>78 kDa glucose-regulated protein</b>          | <b>72 kDa</b> | <b>-0.03</b> | <b>-0.10</b> | <b>-0.14</b> | <b>1.16</b> | <b>&lt; 0.0001</b> | <b>&lt; 0.0001</b> |
| P56480        | ATP synthase subunit beta, mitochondrial         | 56 kDa        | -0.01        | -0.58        | -0.46        | 1.17        | < 0.0001           | < 0.0001           |
| Q61838        | Alpha-2-macroglobulin                            | 166 kDa       | 0.12         | -0.09        | 0.78         | 1.33        | 0.00061            | 0.01               |
| <b>Q92111</b> | <b>Serotransferrin</b>                           | <b>77 kDa</b> | <b>0.00</b>  | <b>0.15</b>  | <b>-0.15</b> | <b>1.35</b> | <b>&lt; 0.0001</b> | <b>&lt; 0.0001</b> |
| <b>P08003</b> | <b>Protein disulfide-isomerase A4</b>            | <b>72 kDa</b> | <b>0.01</b>  | <b>0.37</b>  | <b>0.06</b>  | <b>1.38</b> | <b>0.0035</b>      | <b>&lt; 0.0001</b> |
| <b>P29758</b> | <b>Ornithine aminotransferase, mitochondrial</b> | <b>48 kDa</b> | <b>-0.01</b> | <b>0.15</b>  | <b>0.36</b>  | <b>1.49</b> | <b>&lt; 0.0001</b> | <b>&lt; 0.0001</b> |
| P26443        | Glutamate dehydrogenase 1, mitochondrial         | 61 kDa        | -0.02        | 0.56         | -0.25        | 1.56        | < 0.0001           | < 0.0001           |
| Q91X72        | Hemopexin                                        | 51 kDa        | -0.01        | -0.29        | -2.19        | 1.70        | 0.011              | 0.00079            |

All proteins were identified and relatively quantified by 2 or more unique peptides in all three mass spectrometry experiments; and were significantly different by both randomized permutation and Kruskal-Wallis test with Benjamini-Hochberg FDR used for multiple testing corrections. Proteins identified in both cytosol and membrane fractions are in bold. Data are expressed as log<sub>2</sub> fold change and are sorted by changes in the ApoE-HFD.

## Supplementary Table 2

**Table S2.** Differentially expressed proteins in liver membrane fraction

| Accession     | Protein Name                                       | MW             | Wt-ND        | Wt-HFD       | ApoE-ND      | ApoE-HFD     | Kruskal-Wallis     | Permutation        |
|---------------|----------------------------------------------------|----------------|--------------|--------------|--------------|--------------|--------------------|--------------------|
| Q8VCW8        | Acyl-CoA synthetase family member 2, mitochondrial | 68 kDa         | -0.04        | -2.06        | -1.22        | -2.49        | 0.0097             | 0.009              |
| Q64459        | Cytochrome P450 3A11                               | 58 kDa         | 0.00         | -1.33        | 0.39         | -2.33        | < 0.0001           | < 0.0001           |
| P08226        | Apolipoprotein E                                   | 36 kDa         | -0.08        | 0.94         | -1.15        | -1.89        | 0.0051             | 0.0034             |
| Q9QXE0        | 2-hydroxyacyl-CoA lyase 1                          | 64 kDa         | 0.10         | -0.28        | -0.10        | -1.77        | 0.0074             | < 0.0001           |
| <b>P12710</b> | <b>Fatty acid-binding protein, liver</b>           | <b>14 kDa</b>  | <b>-0.01</b> | <b>-0.42</b> | <b>0.45</b>  | <b>-1.64</b> | <b>&lt; 0.0001</b> | <b>&lt; 0.0001</b> |
| Q8VCH0        | 3-ketoacyl-CoA thiolase B, peroxisomal             | 44 kDa         | -0.09        | 0.20         | 0.05         | -1.47        | 0.0031             | < 0.0001           |
| Q91WL5        | Cytochrome P450 4A12A                              | 58 kDa         | 0.06         | -0.36        | 0.05         | -1.45        | 0.002              | 0.0024             |
| Q64458        | Cytochrome P450 2C29                               | 56 kDa         | 0.00         | -0.28        | 0.41         | -1.31        | < 0.0001           | < 0.0001           |
| <b>P16015</b> | <b>Carbonic anhydrase 3</b>                        | <b>29 kDa</b>  | <b>-0.02</b> | <b>0.20</b>  | <b>0.58</b>  | <b>-1.30</b> | <b>&lt; 0.0001</b> | <b>&lt; 0.0001</b> |
| Q9D379        | Epoxide hydrolase 1                                | 53 kDa         | -0.02        | -0.50        | -0.20        | -1.03        | < 0.0001           | 0.0041             |
| <b>Q9ET01</b> | <b>Glycogen phosphorylase, liver form.</b>         | <b>97 kDa</b>  | <b>0.03</b>  | <b>0.16</b>  | <b>-0.05</b> | <b>-0.99</b> | <b>&lt; 0.0001</b> | <b>&lt; 0.0001</b> |
| <b>P00329</b> | <b>Alcohol dehydrogenase 1</b>                     | <b>40 kDa</b>  | <b>0.01</b>  | <b>-1.12</b> | <b>-0.74</b> | <b>-0.97</b> | <b>&lt; 0.0001</b> | <b>&lt; 0.0001</b> |
| P41216        | Long-chain-fatty-acid--CoA ligase 1                | 78 kDa         | -0.02        | -0.07        | -0.01        | -0.97        | < 0.0001           | < 0.0001           |
| P19157        | Glutathione S-transferase P 1                      | 24 kDa         | -0.08        | 0.06         | -0.03        | -0.86        | 0.0084             | 0.00012            |
| Q8VCT4        | Carboxylesterase 3                                 | 62 kDa         | -0.02        | -0.10        | -0.18        | -0.80        | < 0.0001           | < 0.0001           |
| <b>P24270</b> | <b>Catalase.</b>                                   | <b>60 kDa</b>  | <b>0.00</b>  | <b>-0.12</b> | <b>0.17</b>  | <b>-0.77</b> | <b>&lt; 0.0001</b> | <b>&lt; 0.0001</b> |
| <b>P30115</b> | <b>Glutathione S-transferase A3</b>                | <b>25 kDa</b>  | <b>0.01</b>  | <b>-0.63</b> | <b>0.17</b>  | <b>-0.76</b> | <b>0.00057</b>     | <b>0.001</b>       |
| P00186        | Cytochrome P450 1A2                                | 58 kDa         | -0.02        | -0.52        | 0.46         | -0.76        | < 0.0001           | < 0.0001           |
| P17717        | UDP-glucuronosyltransferase 2B17                   | 61 kDa         | 0.00         | -0.55        | -0.16        | -0.74        | < 0.0001           | < 0.0001           |
| <b>Q99LB7</b> | <b>Sarcosine dehydrogenase, mitochondrial</b>      | <b>102 kDa</b> | <b>-0.04</b> | <b>0.26</b>  | <b>0.42</b>  | <b>-0.71</b> | <b>&lt; 0.0001</b> | <b>&lt; 0.0001</b> |
| P34914        | Epoxide hydrolase 2                                | 62 kDa         | 0.01         | 0.38         | 0.38         | -0.69        | < 0.0001           | < 0.0001           |
| P25688        | Uricase                                            | 35 kDa         | 0.01         | -0.26        | -0.53        | -0.68        | < 0.0001           | 0.002              |

Spanos *et al.* Supplementary Material

|               |                                                     |               |              |              |              |              |                    |                    |
|---------------|-----------------------------------------------------|---------------|--------------|--------------|--------------|--------------|--------------------|--------------------|
| O88451        | Retinol dehydrogenase 7                             | 36 kDa        | -0.01        | 0.04         | -0.34        | -0.68        | 0.0017             | 0.00065            |
| <b>Q63836</b> | <b>Selenium-binding protein 2</b>                   | <b>53 kDa</b> | <b>-0.07</b> | <b>0.43</b>  | <b>0.52</b>  | <b>-0.67</b> | <b>0.00019</b>     | <b>0.00015</b>     |
| P17563        | Selenium-binding protein 1                          | 52 kDa        | -0.07        | 0.43         | 0.52         | -0.67        | 0.00019            | 0.00015            |
| Q9R0H0        | Peroxisomal acyl-coenzyme A oxidase 1               | 75 kDa        | 0.02         | -0.41        | 0.09         | -0.62        | < 0.0001           | < 0.0001           |
| <b>P29758</b> | <b>Ornithine aminotransferase, mitochondrial</b>    | <b>48 kDa</b> | <b>-0.23</b> | <b>-0.11</b> | <b>0.52</b>  | <b>-0.61</b> | <b>&lt; 0.0001</b> | <b>0.011</b>       |
| <b>Q07417</b> | <b>Short-chain specific acyl-CoA dehydrogenase,</b> | <b>45 kDa</b> | <b>0.03</b>  | <b>0.12</b>  | <b>0.81</b>  | <b>-0.53</b> | <b>0.0014</b>      | <b>0.00089</b>     |
| P32020        | Non-specific lipid-transfer protein                 | 59 kDa        | -0.02        | -0.02        | 0.48         | -0.52        | < 0.0001           | < 0.0001           |
| Q99PG0        | Arylacetamide deacetylase.                          | 45 kDa        | -0.02        | 0.29         | -0.09        | -0.52        | 0.00037            | 0.003              |
| Q9DBM2        | Peroxisomal bifunctional enzyme                     | 78 kDa        | -0.02        | 0.28         | 0.27         | -0.51        | < 0.0001           | < 0.0001           |
| P33267        | Cytochrome P450 2F2                                 | 56 kDa        | 0.00         | -0.39        | -0.14        | -0.49        | 0.00014            | < 0.0001           |
| P52760        | Ribonuclease UK114                                  | 14 kDa        | 0.02         | 0.17         | 0.16         | -0.46        | 0.0027             | < 0.0001           |
| Q03265        | ATP synthase subunit alpha, mitochondrial           | 60 kDa        | 0.00         | -0.01        | -0.13        | -0.41        | 0.0035             | 0.003              |
| <b>P10649</b> | <b>Glutathione S-transferase Mu 1</b>               | <b>26 kDa</b> | <b>-0.01</b> | <b>-0.39</b> | <b>0.40</b>  | <b>-0.37</b> | <b>&lt; 0.0001</b> | <b>0.0001</b>      |
| <b>P11588</b> | <b>Major urinary protein 1</b>                      | <b>21 kDa</b> | <b>0.01</b>  | <b>0.01</b>  | <b>0.62</b>  | <b>-0.37</b> | <b>&lt; 0.0001</b> | <b>0.00031</b>     |
| <b>Q8BWT1</b> | <b>3-ketoacyl-CoA thiolase, mitochondrial</b>       | <b>42 kDa</b> | <b>-0.01</b> | <b>0.21</b>  | <b>0.26</b>  | <b>-0.29</b> | <b>&lt; 0.0001</b> | <b>0.011</b>       |
| P58710        | L-gulonolactone oxidase                             | 50 kDa        | 0.01         | -0.32        | 0.37         | -0.18        | 0.00073            | 0.00055            |
| Q91YI0        | Argininosuccinate lyase                             | 52 kDa        | 0.00         | 0.16         | -0.47        | -0.08        | 0.0029             | 0.00035            |
| <b>P17182</b> | <b>Alpha-enolase</b>                                | <b>47 kDa</b> | <b>-0.01</b> | <b>0.22</b>  | <b>-0.40</b> | <b>-0.02</b> | <b>&lt; 0.0001</b> | <b>&lt; 0.0001</b> |
| <b>P08249</b> | <b>Malate dehydrogenase, mitochondrial</b>          | <b>36 kDa</b> | <b>-0.02</b> | <b>-0.17</b> | <b>0.56</b>  | <b>-0.02</b> | <b>0.0032</b>      | <b>0.004</b>       |
| Q91VD9        | NADH-ubiquinone oxidoreductase 75 kDa subunit,      | 80 kDa        | 0.03         | -0.74        | -0.43        | 0.06         | 0.011              | 0.0014             |
| P08113        | Endoplasmin                                         | 92 kDa        | 0.00         | -0.39        | 0.00         | 0.14         | < 0.0001           | 0.0018             |
| P60710        | Actin, cytoplasmic 1                                | 42 kDa        | 0.00         | -0.31        | -0.20        | 0.22         | 0.00042            | < 0.0001           |
| P62855        | 40S ribosomal protein S26.                          | 13 kDa        | -0.02        | -0.66        | -0.51        | 0.25         | 0.012              | 0.003              |
| P63323        | 40S ribosomal protein S12.                          | 15 kDa        | 0.04         | -0.54        | -0.43        | 0.26         | 0.01               | 0.002              |
| O35488        | Very long-chain acyl-CoA synthetase                 | 70 kDa        | -0.01        | 0.48         | -0.11        | 0.26         | 0.00057            | 0.001              |
| O35490        | Betaine--homocysteine S-methyltransferase 1.        | 45 kDa        | 0.01         | 0.84         | -0.10        | 0.27         | < 0.0001           | < 0.0001           |
| P27773        | Protein disulfide-isomerase A3                      | 57 kDa        | -0.02        | -0.25        | -0.02        | 0.28         | < 0.0001           | 0.005              |
| <b>P14211</b> | <b>Calreticulin</b>                                 | <b>48 kDa</b> | <b>0.02</b>  | <b>-0.40</b> | <b>-0.26</b> | <b>0.28</b>  | <b>&lt; 0.0001</b> | <b>0.00074</b>     |
| P00405        | Cytochrome c oxidase subunit 2                      | 26 kDa        | -0.02        | -0.31        | -0.05        | 0.29         | 0.0043             | 0.0022             |

Spanos *et al.* Supplementary Material

|               |                                                   |                |              |              |              |             |                    |                    |
|---------------|---------------------------------------------------|----------------|--------------|--------------|--------------|-------------|--------------------|--------------------|
| <b>P09103</b> | <b>Protein disulfide-isomerase</b>                | <b>57 kDa</b>  | <b>-0.01</b> | <b>-0.04</b> | <b>-0.21</b> | <b>0.36</b> | <b>&lt; 0.0001</b> | <b>&lt; 0.0001</b> |
| Q91YQ5        | Dolichyl-diphosphooligosaccharide--protein        | 69 kDa         | -0.04        | -0.37        | -0.10        | 0.43        | 0.011              | 0.00094            |
| P52196        | Thiosulfate sulfurtransferase                     | 33 kDa         | -0.04        | 0.08         | -0.44        | 0.43        | 0.014              | 0.011              |
| P62918        | 60S ribosomal protein L8.                         | 28 kDa         | -0.02        | 0.30         | -0.49        | 0.46        | 0.00012            | 0.0019             |
| P12787        | Cytochrome c oxidase subunit 5A, mitochondrial    | 16 kDa         | 0.03         | 0.11         | -0.05        | 0.54        | 0.00062            | < 0.0001           |
| <b>P20029</b> | <b>78 kDa glucose-regulated protein</b>           | <b>72 kDa</b>  | <b>-0.01</b> | <b>-0.04</b> | <b>-0.07</b> | <b>0.60</b> | <b>&lt; 0.0001</b> | <b>&lt; 0.0001</b> |
| <b>P08003</b> | <b>Protein disulfide-isomerase A4</b>             | <b>72 kDa</b>  | <b>0.01</b>  | <b>-0.15</b> | <b>-0.32</b> | <b>0.60</b> | <b>&lt; 0.0001</b> | <b>&lt; 0.0001</b> |
| Q99L13        | 3-hydroxyisobutyrate dehydrogenase, mitochondrial | 35 kDa         | -0.15        | 0.82         | 0.61         | 0.62        | 0.0057             | 0.003              |
| P05202        | Aspartate aminotransferase, mitochondrial         | 47 kDa         | -0.03        | 0.19         | 0.04         | 0.62        | < 0.0001           | < 0.0001           |
| <b>Q91Y97</b> | <b>Fructose-bisphosphate aldolase B</b>           | <b>39 kDa</b>  | <b>0.01</b>  | <b>0.64</b>  | <b>-0.27</b> | <b>0.64</b> | <b>&lt; 0.0001</b> | <b>&lt; 0.0001</b> |
| P49429        | 4-hydroxyphenylpyruvate dioxygenase               | 45 kDa         | -0.06        | 0.28         | -0.08        | 0.65        | < 0.0001           | < 0.0001           |
| <b>Q921I1</b> | <b>Serotransferrin</b>                            | <b>77 kDa</b>  | <b>-0.05</b> | <b>0.04</b>  | <b>-0.12</b> | <b>0.69</b> | <b>&lt; 0.0001</b> | <b>0.00038</b>     |
| <b>Q64442</b> | <b>Sorbitol dehydrogenase</b>                     | <b>38 kDa</b>  | <b>-0.10</b> | <b>0.64</b>  | <b>0.30</b>  | <b>0.71</b> | <b>0.01</b>        | <b>0.011</b>       |
| <b>P19096</b> | <b>Fatty acid synthase</b>                        | <b>272 kDa</b> | <b>0.01</b>  | <b>1.01</b>  | <b>0.31</b>  | <b>0.73</b> | <b>0.015</b>       | <b>0.004</b>       |
| Q8BP67        | 60S ribosomal protein L24.                        | 18 kDa         | 0.10         | 0.09         | 0.12         | 0.77        | 0.0028             | 0.0017             |
| Q61176        | Arginase-1                                        | 35 kDa         | -0.03        | -0.05        | -0.04        | 0.81        | < 0.0001           | < 0.0001           |
| Q9WUR2        | Enoyl-CoA delta isomerase 2, mitochondrial        | 43 kDa         | 0.00         | 0.44         | 0.14         | 0.81        | 0.014              | 0.0015             |
| Q99PL5        | Ribosome-binding protein 1                        | 173 kDa        | 0.02         | 0.02         | 0.13         | 0.83        | < 0.0001           | < 0.0001           |
| P12970        | 60S ribosomal protein L7a                         | 30 kDa         | -0.01        | 0.65         | 0.27         | 0.89        | 0.00065            | 0.001              |
| <b>P35505</b> | <b>Fumarylacetoacetase</b>                        | <b>46 kDa</b>  | <b>-0.06</b> | <b>0.57</b>  | <b>0.49</b>  | <b>0.91</b> | <b>&lt; 0.0001</b> | <b>0.00098</b>     |
| Q8CFX1        | GDH/6PGL endoplasmic bifunctional protein         | 89 kDa         | 0.00         | 0.39         | -0.67        | 0.97        | 0.0047             | 0.0004             |
| P97807        | Fumarate hydratase, mitochondrial                 | 54 kDa         | 0.04         | 0.00         | -0.36        | 1.12        | < 0.0001           | < 0.0001           |
| <b>Q00623</b> | <b>Apolipoprotein A-I</b>                         | <b>31 kDa</b>  | <b>-0.41</b> | <b>0.30</b>  | <b>0.72</b>  | <b>1.12</b> | <b>0.0032</b>      | <b>0.0023</b>      |
| Q91VA0        | Acyl-coenzyme A synthetase ACSM1, mitochondrial   | 65 kDa         | -0.30        | 0.44         | 0.66         | 1.35        | 0.00023            | 0.00018            |
| O88569        | Heterogeneous nuclear ribonucleoproteins A2/B1    | 37 kDa         | -0.05        | 0.31         | -0.14        | 1.47        | 0.011              | 0.00096            |
| <b>P16858</b> | <b>Glyceraldehyde-3-phosphate dehydrogenase</b>   | <b>36 kDa</b>  | <b>-0.10</b> | <b>0.84</b>  | <b>0.67</b>  | <b>1.59</b> | <b>&lt; 0.0001</b> | <b>&lt; 0.0001</b> |
| P62806        | Histone H4.                                       | 11 kDa         | 0.07         | -0.89        | -1.37        | 1.78        | 0.0053             | 0.00041            |
| P06151        | L-lactate dehydrogenase A chain                   | 36 kDa         | -0.08        | 0.84         | 0.24         | 2.00        | 0.0011             | < 0.0001           |
| Q8CGP6        | Histone H2A type 1-H.                             | 14 kDa         | -0.01        | -0.44        | -0.73        | 2.17        | 0.004              | < 0.0001           |

### Spanos *et al.* Supplementary Material

|               |                              |               |              |              |              |             |              |                    |
|---------------|------------------------------|---------------|--------------|--------------|--------------|-------------|--------------|--------------------|
| <b>Q8CGP5</b> | <b>Histone H2A type 1-F.</b> | <b>14 kDa</b> | <b>-0.01</b> | <b>-0.44</b> | <b>-0.73</b> | <b>2.17</b> | <b>0.004</b> | <b>&lt; 0.0001</b> |
|---------------|------------------------------|---------------|--------------|--------------|--------------|-------------|--------------|--------------------|

All proteins were identified and relatively quantified by 2 or more unique peptides in all three mass spectrometry experiments; and were significantly different by both randomized permutation and Kruskal-Wallis test with Benjamini-Hochberg FDR used for multiple testing corrections. Proteins identified in both cytosol and membrane fractions are in bold. Data are expressed as log<sub>2</sub> fold change and are sorted by changes in the ApoE-HFD.



## Supplementary Table 3

**Table S3.** Correlation of sRAGE with clinical features of NAFLD

| Variables                 | r       | P      |
|---------------------------|---------|--------|
| sRAGE versus NAS          | -0.176  | 0.1706 |
| sRAGE versus inflammation | -0.2169 | 0.0904 |
| sRAGE versus ballooning   | -0.2007 | 0.1178 |
| sRAGE versus ALT          | -0.2009 | 0.1175 |
| sRAGE versus BMI          | 0.018   | 0.8908 |

Pearson or Spearman correlation was used to analyse the relationship between variables.

Abbreviations: sRAGE, soluble receptor for advanced glycation end products; NAS, NAFLD activity score; ALT, alanine aminotransferase; BMI, body mass index.

## Supplementary Table 4

**Table S4.** Histopathological scoring for individual biopsies from 9 pediatric patients with NAFLD

| Patient | Steatosis | Lobular inflammation | Hepatocellular ballooning | Fibrosis |
|---------|-----------|----------------------|---------------------------|----------|
| 1       | 3         | 0                    | 0                         | 1c       |
| 2       | 3         | 1                    | 0                         | 1c       |
| 3       | 3         | 1                    | 1                         | 2        |
| 4       | 1         | 0                    | 1                         | 1        |
| 5       | 1         | 1                    | 1                         | 3        |
| 6       | 2         | 0                    | 2                         | 3        |
| 7       | 1         | 1                    | 0                         | 1        |
| 8       | 1         | 2                    | 2                         | 3        |
| 9       | 3         | 1                    | 0                         | 3        |
